# Supplementary material for: User-centered design and usability testing of RxMAGIC: a prescription management and general inventory control system for free clinic dispensaries
Source: Springer Nature journal article supplement (doi:10.1186/s12913-018-3517-8), 2018-09-10
Supplement: MOESM1 [file 16111122]

---

**Theme 01: View and maintain inventory through a web-based browser. (10)**

---

I want to have visibility into the medication inventory so that I can inform appropriate staff of insufficient inventory and facilitate reordering.

---

I want to have visibility into the medication inventory so that I don't waste time physically searching for medications in the cabinets that we don't have in stock.

---

I want to have visibility into the specific inventories maintained by the dispensary so that I know which cabinet to access when consulted about stock availability.

---

Pharmacist I want to enter new medication items into the inventory so that I can attach a unique inventory ID barcode to all stock medications.

---

I want to be able to edit drug counts in the inventory so that I can ensure they are accurate at all times.

---

I want to be able to reprint inventory ID labels so that each medication item has a legible barcoded label (should one become detached).

---

I want to be able to delete items from the inventory so that I can cleanse the inventory of expired medication.

---

.....  
Physician I want to have visibility into the current formulary during patient visits so that I can have an informed discussion with the patient about their treatment plan without interrupting the pharmacist.

---

I want to know if a patient is enrolled in a PAP program so that I know I can prescribe certain types of medications.

---

.....  
AmeriCorp I want to enter items into the inventory from my own office so that I can deliver them to the clinic labeled and reduce the pharmacist workload.

---

---

**Theme 02: Use electronic dispensation to update drug counts in real time. (6)**

---

I want electronic dispensation to update drug counts in real time so that stock counts are updated accurately and immediately.

---

I want electronic dispensation to update drug counts in real time so that I am informed of low-inventory levels in the timeliest fashion.

---

Pharmacist I want to be able to electronically dispense medication without a medication order from the EHR so that I can maintain accurate drug counts for OTC medication too.

---

I want to know the history of a dispensation for a certain patient (medications patients are prescribed and taking) from the BFC so that I can avoid drug-drug interactions during dispensation.

---

I want to understand specific stock availability at the point of dispensation so that I ensure we prioritize dispensation of medications approaching expiry.

---

.....

---

Physician I want to know the history of dispensation for a certain patient from the BFC so that I can prevent an adverse drug event during ordering.

---

**Theme 03: Produce computer generated labels upon dispensation. (3)**

---

I want to attach preprinted adhesive labels to dispensed medication so that my documentation tasks become more efficient.

---

Pharmacist I want to attach preprinted adhesive labels to dispensed medication so that the patient clearly understands the medication directions throughout the duration of the prescription.

---

I want to attach preprinted adhesive to prescription medication so that they are complete with all necessary information required for adherence to dispensing standards.

---

**Theme 04: Automatically alert pharmacists of new medication orders after CPOE. (6)**

---

I want to be alerted immediately when a physician has entered medication orders so that we can efficiently initiate the dispensing process and reduce patient wait times.

---

Pharmacist I want to be alerted immediately when a physician has entered medication orders so that I can ensure that the drug is in stock prior to the end of the patient visit.

---

I want to know when a physician is confused during CPOE so that we can resolve the problem and correctly update the order in EpicCare.

---

I want incoming prescriptions to be automatically added to a list in order of their receipt so that I prioritize dispensation to the longest-waiting patients.

---

I want incoming prescriptions to be automatically added to a visible dashboard so that I do not need to continually check the patient dashboard in EpicCare.

---

---

Physician I want the pharmacist to be alerted immediately when I enter a medication via CPOE so that patients aren't waiting for long periods of time if I forget to update their status.

---

**Theme 05: Provide soft-stop alert feed functionality that is updated in real time. (6)**

---

I want to know the expiration date of all medications so that I can prioritize dispensation of near-expiry drugs to reduce wastage.

---

Pharmacist I want to know when medications are expired so that I can keep patients safe by deleting them from the inventory.

---

I want to know the lot number of all medications so that I can quickly respond to medication recalls and keep patients safe.

---

I want to customize par levels so that I am in control of low inventory alerts.

---

I want to be notified when a medication item has fallen below a given threshold so that I can promptly add the item to the order sheet to avoid stockouts.

---

---

I want to know when a PAP patient hasn't returned to the clinic in six months so that I can call the patient or cancel their application

---

**Theme 06: Automatically generate the activity sheet and enable PDF creation. (8)**

---

I want electronic dispensation to populate the activity sheet so that my documentation tasks are more efficient.

---

I want to be able to search and view all old activity sheets within RxMAGIC so that I understand consumption patterns.

---

Pharmacist I want to be able to print the activity sheet so that it gets to delivered to the PHCUP.

---

I want to know when a patient has one month or less of a PMAP medication in stock so that I can indicate its due for reorder on the activity sheet.

---

I want low inventory medications to be automatically added to the activity sheet so that I don't have to remember low-stock items throughout the entire clinic session.

---

.....  
I want to view an automated copy of the activity sheet daily so that I know it is accurate, legible, and on time.

---

AmeriCorp I want to view an automated copy of the activity sheet so that I know which medications to reorder.

---

I want to be able to export and print the activity sheet so that I can save it for my own records.

---

**Theme 07: Provide medication reordering support for the PAP application process. (5)**

---

Pharmacist I want to know the details of a patient's PAP application so that I can ensure their medication is up-to-date and reordered.

---

I want to ensure a patient is enrolled in a PAP application before adding their medication to the inventory.

---

.....  
I want to know the 'date to reorder' a patient's medication so that I can ensure an uninterrupted supply of PAP medications.

---

AmeriCorp I want to view a report of all medications to be reordered in a certain time period so that I don't forget to reorder a patient's medication.

---

I want to know the specific pharmaceutical company program in which a patient is enrolled so that I know who to contact for reordering.

---

**Theme 08: Establish a user management framework. (1)**

---

All I want to be able to login to RxMAGIC with my UPMC credentials so that I don't need to create another set of credentials.

---
